# Supplementary material for: Prevalence and magnitude of groundwater use by vegetation: a global stable isotope meta-analysis
Source: PubMed Central journal article supplement (PMC5345103; doi:10.1038/srep44110), 2017-03-10

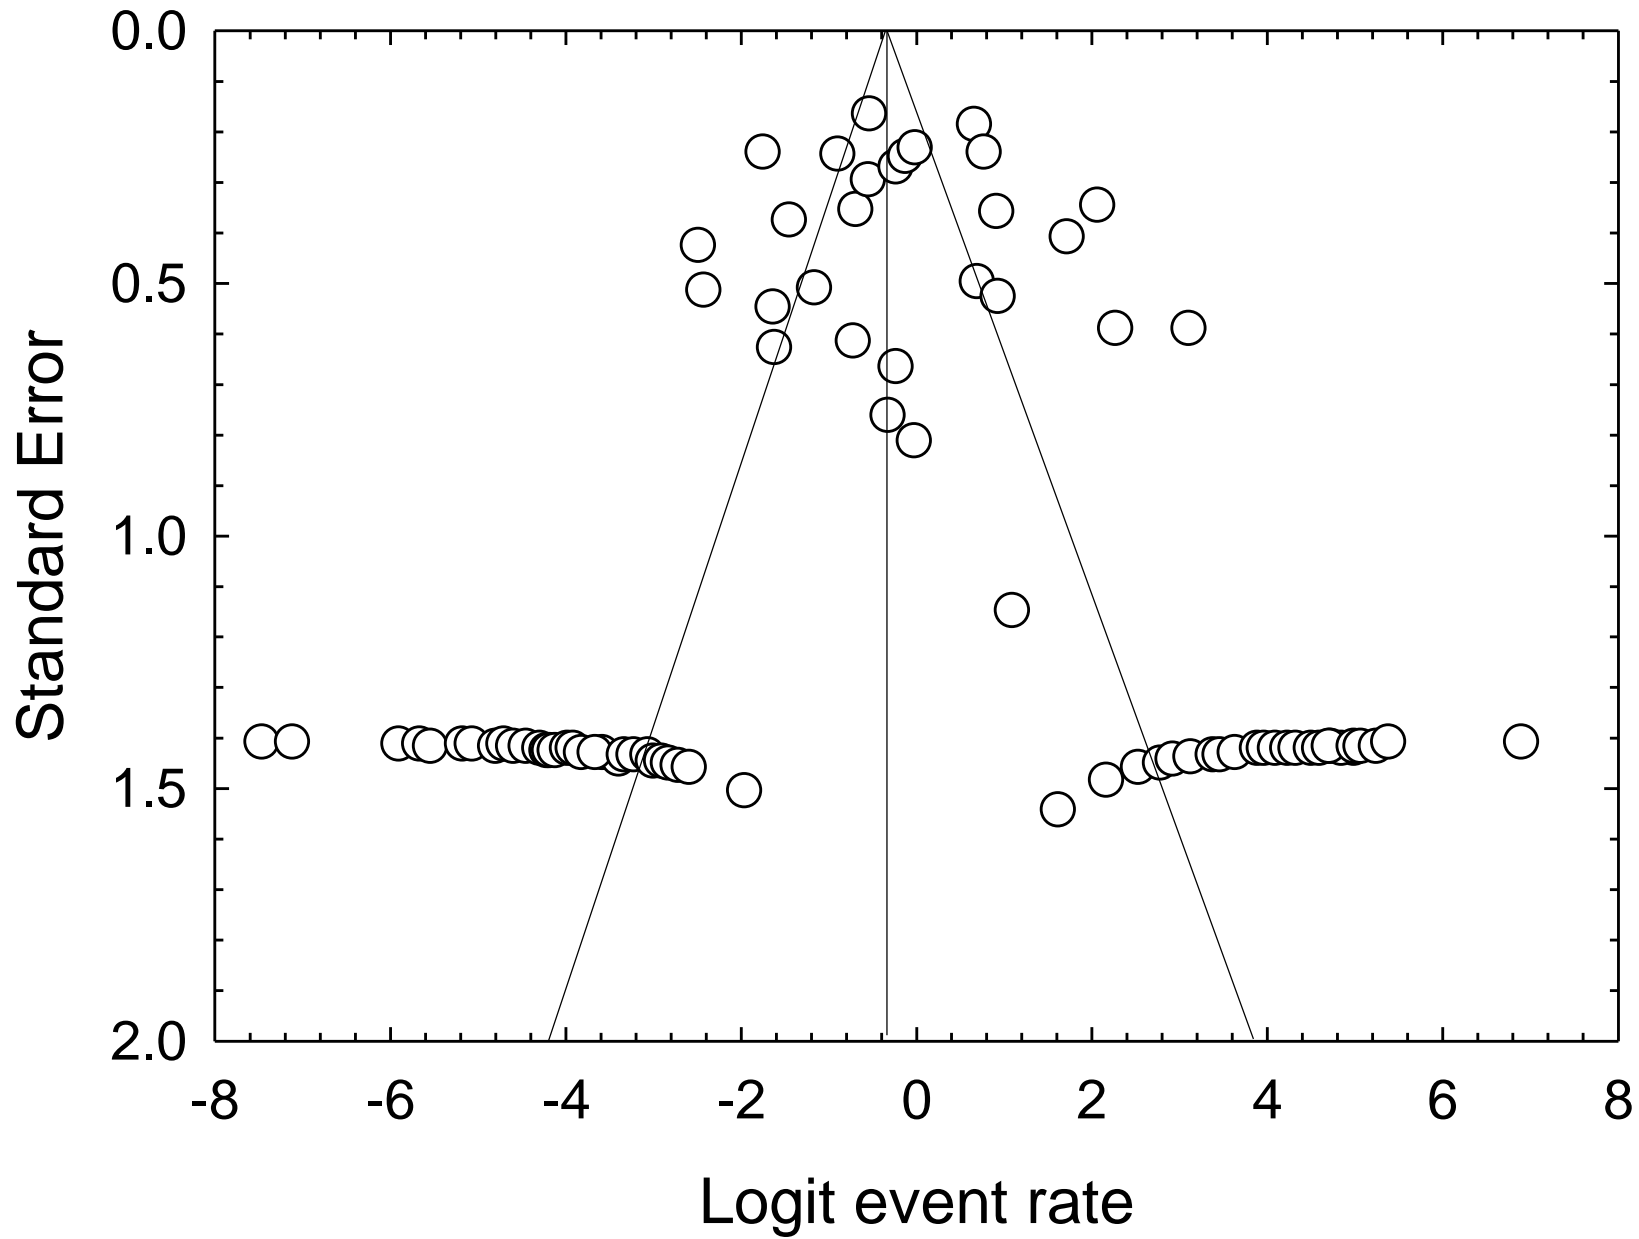

Supplement: srep44110-s1.pdf [file srep44110-s1.pdf]
